**ANNOUNCEMENT AND CALL FOR ABSTRACTS:  
CRITICAL CARE**

ANESTHESIOLOGY, in conjunction with the American Society of Critical Care Anesthesiologists (ASCCA), is pleased to announce a special session at the 2006 American Society of Anesthesiologists (ASA) Annual Meeting in Chicago, Illinois. This forum will serve two purposes. The first is to highlight new and innovative research in Critical Care Medicine. Of even greater importance is our desire to promote the value of mentored research training. To this end, the session will feature (with posters) oral presentations by junior investigators (*i.e.*, those with a rank of Assistant Professor or below and less than 7 yr in rank) whose work has direct bearing on the art and science of Critical Care. Each investigator's talk will be followed by a short presentation by his or her mentor. The mentor's talk will highlight how the presented work fits into the overall scheme of investigation in the mentor's laboratory and how it will contribute to our understanding of any aspect of Critical Care Medicine. Participation by the audience will be encouraged.

Investigators involved in all types of research, including but not limited to basic science, clinical investigations, outcomes-based studies, epidemiology, and safety-oriented investigations, are invited to submit their best work for consideration. A committee consisting of Journal Editors and representatives of the ASCCA will select the abstracts and presenters for this session. Our goal is to gather a large number of individuals with an interest in Critical Care and its importance to the practice of anesthesiology.

Abstracts should be submitted online to the ASA Annual Meeting using the standard online process (which can be accessed *via* the Web sites [www.ASAhq.org](http://www.ASAhq.org) and [www.anesthesiology.org](http://www.anesthesiology.org)). Select Critical Care as the major subject area. In addition, authors should notify the ANESTHESIOLOGY Editorial Office *via* e-mail ([anesthesiology@uiowa.edu](mailto:anesthesiology@uiowa.edu)) regarding their interest in being considered for the specific session. The deadline for abstract submission is April 1, 2006. The authors of abstracts that are selected for this session will also be offered an opportunity to submit their work to ANESTHESIOLOGY, for inclusion in a special issue to be published in 2007.

**ANNOUNCEMENT AND CALL FOR ABSTRACTS:  
OBSTETRIC ANESTHESIA**

ANESTHESIOLOGY and the Society for Obstetric Anesthesia and Perinatology (SOAP) are extremely interested in highlighting new and innovative research in the field of Obstetric Anesthesia. We are therefore jointly organizing a special session during the American Society of Anesthesiologists (ASA) Annual Meeting, October 14-18, 2006, in Chicago, Illinois.

This will be an oral presentation session (without posters). A committee consisting of Journal Editors and representatives of SOAP will select the abstracts and presenters for this session. Authors will then be invited to prepare a formal 10-minute oral presentation of their work. Experts in the appropriate areas will be invited to participate in the discussion of each presentation. Our goal is to gather as many individuals as possible with an interest in Obstetric Anesthesia to participate in this session and to present the most innovative laboratory and clinical research available today.

Abstracts should be submitted online to the ASA Annual Meeting using the standard online process (which can be accessed *via* the Web sites [www.ASAhq.org](http://www.ASAhq.org) and [www.anesthesiology.org](http://www.anesthesiology.org)). Select Obstetric Anesthesia as the major subject area. In addition, authors should notify the ANESTHESIOLOGY Editorial Office *via* e-mail ([anesthesiology@uiowa.edu](mailto:anesthesiology@uiowa.edu)) regarding their interest in being considered for the specific session. The deadline for abstract submission is April 1, 2006.
